# Supplementary material for: Surface renewal as a significant mechanism for dust emission
Source: Copernicus journal article supplement (doi:10.5194/acp-16-15517-2016), 2016-12-15
Supplement: Supplementary file 1 [file acp-16-15517-2016-supplement.zip]

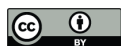

## *Supplement of*

# **Surface renewal as a significant mechanism for dust emission**

**Jie Zhang et al.**

*Correspondence to:* Ning Huang ([huangn@lzu.edu.cn](mailto:huangn@lzu.edu.cn))

- [acp-16-15517-2016-supplement-title-page.pdf](#)
- [data.xlsx](#)

The copyright of individual parts of the supplement might differ from the CC-BY 3.0 licence.
